# **A dual-mode targeted Nanopore sequencing assay for comprehensive *SMN1* and *SMN2* variant analysis**

**Running title:** Long read sequencing-based analysis of *SMN1/SMN2*

Brad Hall<sup>1\*</sup>, Sawsan Alyafei<sup>2\*</sup>, Sathishkumar Ramaswamy<sup>2</sup>, Shruti Sinha<sup>2</sup>, Maha El Naofal<sup>2</sup>, Fatma Rabea<sup>2,3</sup>, Bryan J. Killinger<sup>1</sup>, Gary J. Latham<sup>1</sup>, Ahmad Abou Tayoun<sup>2,4</sup>

<sup>1</sup>Asuragen, A Bio-Techne Brand, Texas, USA

<sup>2</sup>Genomics Center of Excellence, Al Jalila Children's Specialty Hospital, Dubai Health, Dubai, UAE

<sup>3</sup>Mohammed Bin Rashid University of Medicine and Health Sciences, Dubai Health, Dubai, UAE

<sup>4</sup>Center for Genomic Discovery, Mohammed Bin Rashid University of Medicine and Health Sciences, Dubai Health, Dubai, UAE

\*Equally contributed to this work

**Corresponding Author:** Ahmad Abou Tayoun; [Ahmad.Tayoun@dubaihealth.ae](mailto:Ahmad.Tayoun@dubaihealth.ae)

**Keywords:** Enrichment, Nanopore Sequencing, *SMN1/2*, SMA, Carrier Screening

**Previously presented at Oxford Nanopore Technologies London Calling 2023**

**Word Count:** 3523

**5 Figures and Tables**

**Abbreviations:**

SMA, Spinal Muscular Atrophy

- 29 SNVs, Single nucleotide variants
- 30 Indels, Insertions and deletions
- 31 CNVs, Copy number variants
- 32 NGS, Next generation sequencing
- 33 US, United States
- 34 FDA, Food and Drug Administration
- 35 HRM, High-resolution melt
- 36 MLPA, Multiplex ligation-dependent probe amplification
- 37 ONT, Oxford Nanopore Technologies
- 38 PCR, Polymerase chain reaction
- 39 gDNA, Genomic DNA
- 40 NHGRI, National Human Genome Research Institute
- 41 NIGMS, National Institute of General Medical Sciences
- 42 ddPCR, droplet digital PCR
- 43 CE, Capillary electrophoresis
- 44 QC, Quality control
- 45
- 46 **Human Genes:**
- 47 *SMN1* survival of motor neuron 1, telomeric HGNC:11117
- 48 *SMN2* survival of motor neuron 2, centromeric HGNC:11118
- 49 *CFTR* CF transmembrane conductance regulator HGNC:1884

## 50 **Abstract**

## 51 **Background**

52 Spinal Muscular Atrophy (SMA) is one of the most common recessive disorders for  
53 which several life-saving treatment options are currently available. It is essential to  
54 establish universal SMA screening and diagnostic programs using scalable, cost-  
55 effective and accessible platforms to accurately identify all variation types, which is  
56 complicated by homologous *SMN1* and *SMN2* genes.

## 57 **Methods**

58 We developed a dual-mode PCR-based target enrichment that generates 2.7 to 11.2  
59 kb amplicons spanning *SMN1* and *SMN2* genes for any-length nanopore  
60 sequencing. We trained a variant calling model that utilizes paralog-specific  
61 sequences and read-depth data to accurately detect sequence and copy number  
62 variants specific to each gene.

## 63 **Results**

64 We present results from the development, optimization, and external evaluation of  
65 this assay using over 750 samples, including cell lines, residual presumed normal  
66 blood donors, and patients with known *SMN1* and *SMN2* genotypes. The assay  
67 detects SNVs, indels, and CNVs with >98% accuracy across all sample sets, with a  
68 highly dynamic throughput range, relatively fast turnaround time, and limited hands-  
69 on-time. Together with the modest capital investment and consumable costs per  
70 sample, this assay can help increase access to SMA testing in low- and middle-  
71 income settings.

## 72 **Conclusion**

73 We describe a PCR/Nanopore sequencing assay and a customized analysis pipeline  
74 for the comprehensive and accurate detection of variation at the SMA locus and

75 demonstrate its scalability, cost-effectiveness, and potential for the universal  
76 implementation of SMA screening and diagnostic programs.

77

## 78 Introduction

79 Spinal Muscular Atrophy (SMA) is the second most common autosomal recessive  
80 disease and the most common genetic cause of infant death (1). In around 95% of  
81 cases, SMA is caused by a homozygous deletion of the *SMN1* gene, which encodes  
82 for the survival motor neuron 1 protein (2, 3, 4); loss of this protein leads to  
83 degeneration of the motor neurons in the spinal cord and progressive muscle  
84 weakness, paralysis and, if untreated, premature death (5). Additional intragenic and  
85 structural variants have also been identified (6).

86

87 Both *SMN1* and its paralog, *SMN2* encode the same protein, SMN, and copy  
88 numbers of each within the genome can range from zero to four or more. SMA  
89 disease is modified by copy number status of the *SMN2* gene, which has >99.9%  
90 sequence identity to *SMN1* (7), though it does not produce a functional product  
91 because of a single nucleotide change in exon 7 that causes exon skipping and  
92 produces a truncated, nonfunctional protein (8). However, due to leaky expression of  
93 the full-length protein from the *SMN2* locus, its copy number status is inversely  
94 correlated with SMA clinical phenotype and disease severity (9, 8, 10). Patients at  
95 the severe end of the spectrum (SMA type I) often have one copy of *SMN2*, while  
96 those with a milder phenotype (SMA type IV) have greater than or equal to 4 copies  
97 of this gene (9, 11, 5).

98

99 Given its prevalence, life-threatening outcomes and, most recently, the availability of  
100 three life-saving medications approved by the US FDA (Zolgensma, Spinraza, and  
101 Evrysdi), genetic diagnostic and screening programs have become essential for risk  
102 assessment, early detection, and timely patient treatment (12, 13). Such programs,

however, require rapid, accurate, and comprehensive testing platforms to unambiguously detect and resolve single nucleotide (SNVs) and copy number variants (CNVs) in the *SMN1* and *SMN2* genes, as well as complex rearrangements leading to gene conversions (14) and silent carriers (15).

SMA testing strategies should also be highly scalable, cost-effective, and not require significant capital investment or complex infrastructure to support the deployment of universal screening programs in low-resource settings (16). These qualities are not only essential for equitable global access to screening but also important for characterizing disease epidemiology (incidence, prevalence and carrier frequencies) across populations. Such information can then inform the most appropriate screening and prevention strategies (17).

Since *SMN2* has high homology to *SMN1*, current screening methods such as NGS often require complex analysis methods that are difficult to interpret and may not accurately resolve *SMN1* copy number variants. Targeted copy number methods such as high-resolution melt (HRM) and multiplex ligation-dependent probe amplification (MLPA) are not designed to detect many pathogenic variants (18, 6). Recently, long-read sequencing has emerged as an option to identify copy number and pathogenic variants in a single workflow (19; 20). Recent advancements in sequencing technologies may help overcome these challenges by incorporating much longer unique reads that can differentiate *SMN1* from *SMN2* via paralog-specific variants. However, such assays are limited by accessibility, capital costs, and costly and complex operational infrastructure.

To address these limitations, we developed a complete assay and workflow for *SMN1* and *SMN2* genetic analysis using targeted PCR amplification, Oxford Nanopore (ONT) any-length sequencing, and a customized analytical algorithm that resolves multiple variant classes. We report results with more than 750 samples demonstrating high accuracy across diverse and complex genotypes. We also discuss operational and real-world advantages for carrier screening and diagnostic applications, including simple library preparation, flexible sample throughput, low capital investment, small instrument footprint, and modest consumable cost per sample.

## Methods

### Assay Prototyping cohort

The prototype assay was developed using genomic DNA (gDNA) from cell lines (N=97) obtained from the Centers for Disease Control and Prevention Repository (N=4), National Human Genome Research Institute (NHGRI) Sample Repository for Human Genetic Research (N=12), and National Institute of General Medical Sciences (NIGMS) Human Genetic Cell Repository (N=73) at the Coriell Institute for Medical Research (Camden, NJ; **Supplemental Table 1**). Additionally, cell lines (N=8; described in [21](#)) were procured from ATCC and isolated using a precipitation-based method (Qiagen, Hilden, Germany).

### Assay Optimization cohort

Human-derived, presumed normal, de-identified residual whole blood specimens (N=227) were obtained from We Are Blood (Austin, TX) under the required regulatory approvals for evaluating clinical specimens. Whole blood was purified

using either silica resin/column-based method (Qiagen, Hilden, Germany) or functionalized magnetic bead (Applied Biosystems, Waltham, MA). Genomic DNA quantity (ng/uL) and quality ( $A_{260}/A_{280}$ ) were assessed using spectrophotometry. Samples were diluted in nuclease-free water to the target concentration for analysis using the assay.

### **Assay Evaluation cohort**

De-identified samples with known SMA copy number status as determined by clinical testing using a droplet digital PCR assay (see below) at the CAP-accredited genomics center, at Al Jalila Children's Specialty Hospital (Dubai, United Arab Emirates), were used for assay evaluation and test performance characterization. This study was approved by the Dubai Health Authority Research Ethics Committee (DSREC-07/2023\_06 and DSREC-SR-03/2023\_08).

### **Droplet digital PCR**

Genomic DNA extracted from peripheral blood (N = 70) were tested for *SMN1* and *SMN2* copy number status using a proprietary droplet digital PCR (ddPCR) assay (Bio-Rad, USA) following manufacturer's instructions. This assay was clinically validated by the Al Jalila Children's genomics laboratory (22).

### **PCR and capillary electrophoresis (PCR/CE)**

Only samples determined to have a homozygous deletion of the *SMN1* gene by ddPCR (N = 32) were clinically tested for *SMN2* copy number status by ddPCR. For the remaining samples with  $\geq 1$  *SMN1* copies (N = 44), *SMN2* dosage status was determined by the AmplideX® PCR/CE *SMN1/2* Plus Kit as previously described



(23). In addition, this method was utilized to assess both *SMN1* and *SMN2* copy number for all cell line and presumed normal whole blood samples during assay development and optimization.

## PCR and Nanopore Sequencing (PCR/Nanopore)

The prototype assay workflow includes PCR master mix setup, gene-specific amplification, sample specific barcoding, paramagnetic bead size selection and concentration, library adapter ligation, Nanopore sequencing, and assay-specific analysis pipelines (**Figure 1**). Roughly 40ng gDNA was amplified by multiplex PCR targeting 2.7kb regions of *SMN1* or *SMN2* exons 7-8 and copy number neutral endogenous control amplicons from *CFTR* in one mix or a larger 11.2kb amplicon encompassing exons 3-8 in a separate mix. Reactions were cleaned up using 0.6X AMPure XP bead ratio (Beckman Coulter, Indianapolis, IN). Samples were tagged with unique barcodes during a second PCR reaction, normalized by mass after Qubit quantitation (Invitrogen, Carlsbad CA), pooled into a single reaction, and concentrated using 0.6X AMPure XP bead ratio.

Sequencing libraries were prepared using the Nanopore Ligation Sequencing Kit (LSK-110 or LSK-114; ONT). Sequencing was conducted using MinKNOW software (22.10.10) on MinION flow cells (R9.4.1 or R10.4.1) with a Mk1B sequencer connected to a computer. Sequencing proceeded for at least 5 hours to obtain a minimum of 150 fully-spanning reads per copy per region. Super-accurate base calling was performed using Guppy (6.3.9) after sequencing and fully spanning reads were aligned to GRCh38 using minimap2 (2.15+dfsg-1).

To determine copy number, we trained a gradient boosting tree model to predict copy number using the ratio of Cs and Ts at the paralog specific variant c.840C>T in exon 7 (NM\_000344.3c.840C>T; Single Nucleotide Polymorphism database, <https://www.ncbi.nlm.nih.gov/snp>, accession number rs1164325688, build 155, last accessed August 15<sup>th</sup>, 2023) (**Supplemental Figure 1**). The model incorporates read depth of fully spanning 2.7kb fragments aligned to *SMN1* (c.840C) or *SMN2* (c.840T) and the geometric mean of endogenous control amplicons (*CFTR*) to infer fold change based on normalized read depth in 2-copy calibrator samples (**Supplemental Figure 2**). The machine learning algorithm was trained on a subset of cell lines (N=79) and an independent set of residual whole blood samples (N=352). Hyperparameters for the decision tree model were selected using an 80:20 train:test split in a stratified randomly selected five-fold cross validation scheme.

Additionally, *SMN1* and *SMN2* copy number was informed with the longer 11.2kb amplicon flagged as edge cases where the machine learning algorithm predicted a copy number of 2.25 to 2.75. First, unique haplotype groups were identified and differentiated by sequence variability (e.g. SNVs) corresponding to unique copies aligning to the same region of the genome (**Supplemental Figure 3**). This allows for the identification of all unique copies for a gene target, and thus can be used to inform copy number calls and provide proper input to variant calling software that often assumes no more than two copies of the gene are present. Group sizes were normalized according to read depth and copy number was inferred for each group. The number of normalized haplotype groups were reported as the predicted copy number for samples that were flagged as edge cases when more than one group was identified.

Predicted copy number from the PCR/Nanopore assay was compared to data collected by orthogonal methods (ddPCR and/or PCR/CE). Small nucleotide variants and insertion/deletions were identified using Clair3 (24).

## Results

### Assay Development and Optimization

We developed a complementary, two-in-one MinION-based assay utilizing amplicons ranging more than 10-fold in length, including reference loci, to identify *SMN1* and *SMN2* variants. Assay designs and analysis methods were optimized for copy number changes and phased SNVs and indels (**Figure 1**). Primers were developed to amplify ~800-3000 base fragments (“short” amplicons) encompassing both *SMN1* and *SMN2* exon 7-8 and endogenous controls (**Supplemental Figure 2**). The assay assesses *SMN1* or *SMN2* copy number by aligning reads spanning exons 7 and 8 to either *SMN1* or *SMN2*, then determining the raw read depth and ratio of reads associated with c.840C (*SMN1*) or c.840T (*SMN2*). A machine learning method infers copy number by comparing the C:T ratio in exon 7 and corresponding read depths to endogenous control amplicons in calibrator samples.

We also designed primers to amplify an 11.2kb fragment (“long” amplicon) encompassing exons 3-8 to enhance phasing SNVs in *SMN1* or *SMN2* (**Supplemental Figure 3**). This long amplicon typically captures several paralog-specific variants and facilitates sequence deconvolution of reads into haplotype groups to infer copy number. In some samples, however, there are no copy distinguishing sequence variants within one or both paralogs to independently resolve copy number.

253

254 The assay was developed and evaluated in three phases (**Figure 2**). In the  
255 prototyping phase, gene-specific primers, protocols, and reagents were designed  
256 and tested on a diverse set of cell line (N=79) and presumed normal whole blood  
257 (N=352) samples. This set included independently analyzed *SMN1* and *SMN2*  
258 genotypes ranging from 0 to  $\geq 4$  copies along with SNVs and Indels described below.  
259 Sequencing data were collected with short and long amplicons. Algorithms were  
260 trained using amplicon sequence and read depth within *SMN1* and *SMN2* compared  
261 to known genotypes for each sample. We also identified endogenous control  
262 amplicons and calibrator samples to convert *SMN1* and *SMN2* read-depth ratios into  
263 copy numbers.

264

265 In the assay optimization phase, performance was first evaluated with the short,  
266 2.7kb amplicon design utilizing a sample cohort of 18 additional cell lines (N=97  
267 total) and an independent set of whole-blood samples (N=227) across 0 to  $\geq 3$  *SMN1*  
268 and *SMN2* copies (**Figure 33**). Assay copy number predictions were compared to  
269 PCR/CE data and segregated by sample type.

270

271 Copy number agreement was 97.9% (95/97) between PCR/Nanopore and  
272 comparator method for both *SMN1* and *SMN2* in the cell-line set. One sample  
273 (NA20232) was discordant for both *SMN1* and *SMN2*. This cell line was expected to  
274 be 3 copy *SMN1* and 2 copy *SMN2* (3/2) by PCR/CE yet reported as 2/1 by the  
275 PCR/Nanopore assay. Two other samples had either *SMN1* or *SMN2* discordant  
276 copy number data where a 3 copy was expected, yet a 2 copy was predicted by the

algorithm. In each case, haplotype deconvolution with the long amplicon supported the expected copy number.

In the whole blood sample cohort, 218/227 (96.0%) *SMN1* and 224/227 (98.7%) *SMN2* copy number calls agreed between PCR/Nanopore and comparator method. Of the 9 discordant samples for *SMN1*, 7 discordant samples had more than one haplotype. We used the long amplicon design to investigate these discordances, consistent with methods described. Six of the seven samples agreed with comparator data when both amplicon designs were utilized. Four of 9 discordant samples were flagged as edge cases at or near the call threshold with the short amplicon and 3 were resolved by haplotype deconvolution with the long amplicon design.

Consequently, we applied the flagging QC across the entire dataset to determine the effect on accuracy (**Figure 33**). One cell line and 12 whole blood samples were flagged as edge cases at or near the call threshold with the 2.7kb amplicon for *SMN1*. Of these, 4 were discordant using the short amplicon alone, but 3 were corrected by calls using the long amplicon. Similarly, of the 3 *SMN2* calls flagged only 1 was discordant and long amplicon design supported the expected copy number. In no instance was a sample flagged where the long amplicon call disagreed with comparator data when at least 2 haplotype groups were identified. As a result, both amplicon designs were used for all subsequent analyses where call threshold flagging prioritized the long amplicon copy number call.

In addition to copy number evaluation, the assay was designed to identify and phase SNVs and indels without reflexing to other assays. For example, the *SMN2*, NM\_017411.3: c.859G>C variant (dbSNP, rs121909192, build 155, last accessed August 15<sup>th</sup> 2023) is associated with a less severe SMA phenotype (25, 26, 27, 28). Two variants linked with the *SMN1* duplication haplotype have been shown to flag silent carriers and increase carrier detection rates when 2 *SMN1* copies occur on the same chromosome. These variants are NM\_000344.3:c.\*3+80T>G (alias g.27134T>G; dbSNP, rs143838139, build 155, last accessed August 15<sup>th</sup> 2023) and NM\_000344.3: c.\*211\_\*212del (alias g.27706\_27707delAT; dbSNP, rs200800214, build 155, last accessed August 15<sup>th</sup> 2023).

PCR/Nanopore genotyping of these variants agreed with the PCR/CE comparator method in 324/324 samples for c.\*3+80T>G and c.859G>C, and in 322/324 (99.4%) for c.\*211\_212del (**Figure 4**). Investigation of the two discordant samples suggested erroneous comparator data. In HG00691, a rare non-pathogenic deletion in *SMN2* (rs576032516) shifted a CE peak into the mutant CE bin, resulting in a false positive. In the second sample, the automated peak caller in the CE assay incorrectly called noise along the baseline within the c.\*211\_212del bin, resulting in another false positive call.

## Independent Evaluation of Residual Clinical Samples

Next, we evaluated assay performance across a diverse, independent cohort of samples from 70 individuals (57% females, average age 2.17 years, range 1 day – 16 years) with known *SMN1* and *SMN2* copy number status originally tested at AI

Jalila Children's Specialty Hospital, Dubai, UAE. Those individuals represented 14 countries, primarily from the Middle East and North Africa (**Supplemental Table 2**).

Of all individuals, 30 (42.9%) had homozygous deletions in the *SMN1* gene, while the remaining 40 (57.1%) had 1 to 4 copies of this gene. Sixty-seven of the 70 samples were also evaluated for *SMN2* copy number. Most individuals (58%) had 2 *SMN2* copies, 10% had 0 copies and 42% had 1, 3, or  $\geq 4$  copies of this gene (**Supplemental Table 3**).

The PCR/Nanopore assay correctly identified 70/70 and 65/67 of *SMN1* and *SMN2* copy number states for a concordance rate of 100% (95% CI, 94.80% - 100.00 %) and 97.0% (95% CI, 89.75% - 99.18%), respectively (**Table 1**).

### **Cost Effectiveness and Hand-On Time**

The accessibility and broad use of an *SMN1/2* screening and genotyping assay depends on numerous criteria, including performance, operational factors and cost. Assay workflow, analysis and economic considerations are especially important for laboratories in lower resource environments. We assessed these elements by performing a time-motion analysis, quantifying the scalability of the assay across different sample batch volumes, and calculating estimated costs per sample.

Time-motion analysis was estimated across 6 operators based on experience for both a 24- and 96-sample batch (**Supplemental Table 4**). The workflow from sample to answer requires less than 48 hours for a 24-sample batch on a Mk1B connected to a computer with a recommended GPU. Gene-specific and barcoding PCR can be

completed in a single work shift. Subsequently, samples can be pooled, the library prepared, and sequencing initiated with sequencing and analysis completed overnight for review the next day. A 96-sample batch required additional sequencing and data processing time but was still completed within 72 hours.

The assay supports 12 to 96 samples per batch (**Supplemental Table 5**). Batch size is currently only limited by the recommended barcodes available from ONT (N=96) since flow cells can routinely process >10M reads. A single Mk1B running 12 samples once per week could screen 624 samples per year. By comparison, 480 samples could be processed per batch on one GridION with 5 independently accessible flow cells, real-time base calling, demultiplexing, and alignment. Utilizing 3 staggered run batches per week a lab could process 75,000 samples per year. This throughput can scale linearly by adding additional GridION instruments. In addition, the assay supports automated reaction setup, bead isolation, quantitation, and data analysis to further improve workflow efficiency.

We estimated less than \$20 USD per sample for materials costs excluding PCR (**Supplemental Table 6**). Since the assay is still in development, PCR enrichment costs cannot be accurately determined. For example, the assay design must be finalized and verified, reagents and kits manufactured, and quality control and release testing established. However, PCR is well documented to be highly cost-effective at scale, and we expect that the total per-sample costs will be comparable to other *SMN1/2* diagnostic kits that provide far less genotyping information and insight. These costs also do not include instrument-related expenses. Importantly, ONT instruments (e.g. Mk1B and GridION) have low capital requirements and



benchtop footprints, which creates flexibility for laboratories in how they implement the technology. For either instrument, a computer is required for data analysis. For Mk1B instruments, the computer must be equipped with a high-performance GPU to utilize live basecalling, demultiplexing, and alignment during sequencing.

## Discussion

We developed a novel dual-mode PCR/Nanopore sequencing assay for comprehensive, scalable and cost-effective *SMN1/2* genotyping. The assay design utilizes a PCR target enrichment approach to generate 2.7kb “short” and 11.2kb “long” amplicons spanning regions of the *SMN1* and *SMN2* genes, as well as a machine learning-based analytical pipeline haplotype phasing and read depth data to decipher sequence and copy number variants specific to both highly homologous genes.

Data from both amplicons were combined to achieve the highest accuracy for the prototype assay (>97%). Other long-read sequencing designs utilize only phased haplotype analysis either by hybrid capture (20) or multiple ultra-long (>26kb) amplicons on the PacBio SMRT platform (19). Robustness may be adversely affected by identical haplotypes without read depth normalized to endogenous and exogenous control amplicons. Indeed, we observed identical haplotype groups in our sample set when only the long amplicon was used for copy number evaluation. In contrast, the PCR/Nanopore assay utilizes a combination of read-depth normalization (short amplicon) and haplotype phasing (long amplicon) to resolve *SMN1* and *SMN2* copy number and phase pathogenic SNV/introns. In addition, the assay scales from tens to tens of thousands of samples per year with reduced

capital and per-sample costs compared to other sequencing-based assays. Reducing costs is critical for many existing screening labs or those looking to adopt such screening assays, as reimbursement costs are not always able to cover test costs with NGS workflows. Lastly, the assay includes analysis and reporting software to reduce interpretation expertise and overhead, though the full suite of push-button automated analysis software is still in development.

We acknowledge a few limitations of the current study. The optimized prototype was designed to phase variants across *SMN1* or *SMN2* exons 3-8. Although we demonstrated variant phasing with non-pathogenic silent carrier and disease modifier SNVs, full exon coverage of *SMN1* and *SMN2* is preferred to assess all potential SNV/indel variants. In ongoing work, we have extended the assay design to cover exons 1, 2a, and 2b, though performance has not yet been evaluated. Further, amplification efficiency must be optimized to reduce read depth variability between samples by optimizing primers and cycling conditions. These modifications are expected to improve the resolution and differentiation of 3- and 4-copy genotypes, especially important for treatment decisions that may rely on accurate high copy number *SMN2* calls when *SMN1* is not detected. We have also begun evaluating additional endogenous control amplicons to improve accuracy. Finally, we recognized that amplicon-based methods can be affected by sample-specific SNVs in primer-binding regions. This risk was reduced by utilizing two different primer sets across different amplicon sizes to resolve copy number.

In summary, we present results from the development, optimization, and external evaluation of a novel PCR/Nanopore assay using over 750 samples, including cell

lines, residual presumed normal blood donors, and patient specimens with known *SMN1* and *SMN2* genotypes. The results reveal accurate detection of multiple categories of clinically informative variants, including SNVs, indels and CNVs. SNV phasing was demonstrated through known silent carrier (2+0) and disease-modifier variants. Importantly, the assay is cost-effective and scalable, showing potential for broad implementation in diagnostic and screening programs. Last, we note a key benefit of the assay chemistry, platform and workflow is its flexibility to include additional, variants in *CFTR*, *FMR1*, and *HBA1/2* and other genes associated with commonly screened genetic disorders. This extensibility may further expand the utility of the approach and application and represents an important future direction for technology development.

## Funding

This work received funding support from Asuragen and Oxford Nanopore Technologies in the form of reagents and consumables.

## Conflict of Interest

BH, BK, and GL are employees of Bio-Techne with stock and stock options in this company.

## Acknowledgements

We would like to thank all members of Al Jalila Children's Genomics Center, Asuragen, and Oxford Nanopore Technologies, specifically Frédérique Lerêteux, Rita Aoun, and Hannah Lucio, for their valuable input on this work.

## References

1. D'Amico A, Mercuri E, Tiziano FD, Bertini E. Spinal muscular atrophy. Orphanet J Rare Dis 2011;6:71. <https://pubmed.ncbi.nlm.nih.gov/7813012/>
2. Lefebvre S, Bürglen L, Reboullet S, Clermont O, Burlet P, Viollet L, et al. Identification and characterization of a spinal muscular atrophy-determining gene. Cell 1995;80:155-65. <https://www.ncbi.nlm.nih.gov/pubmed/7813012/>
3. Roy N, Mahadevan MS, McLean M, Shutter G, Zahra Yaraghi, Reza Zanjirani Farahani, et al. The gene for neuronal apoptosis inhibitory protein is partially deleted in individuals with spinal muscular atrophy. Cell 1995;80:167–78.
4. Thompson TG, DiDonato CJ, Simard LR, Ingraham SE, Burghes AH, Crawford TO, et al. A novel cDNA detects homozygous microdeletions in greater than 50% of type I spinal muscular atrophy patients. Nat Genet 1995;9:56-62. <https://pubmed.ncbi.nlm.nih.gov/7704025/>
5. Prior TW, Leach ME, Finanger E. Spinal Muscular Atrophy [Internet]. Adam MP, Ardinger HH, Pagon RA, Wallace SE, Bean LJ, Mirzaa G, et al., editors. PubMed. Seattle (WA): University of Washington, Seattle; 1993. <https://pubmed.ncbi.nlm.nih.gov/20301526/>
6. Wadman RI, Jansen MD, Stam M, Wijngaarde CA, Curial CAD, Medic J, et al. Intragenic and structural variation in the SMN locus and clinical variability in

spinal muscular atrophy [Internet]. Brain Commun 2020;2:fcaa075

<https://pubmed.ncbi.nlm.nih.gov/32954327/>

7. Chen X, Sanchis-Juan A, French CE, Connell AJ, Delon I, Kingsbury Z, et al. Spinal muscular atrophy diagnosis and carrier screening from genome sequencing data. Genetics in Medicine 2020;22:945–53.

<https://www.nature.com/articles/s41436-020-0754-0#ref-CR6>

8. Lorson CL, Hahnen E, Androphy EJ, Wirth B. A single nucleotide in the SMN gene regulates splicing and is responsible for spinal muscular atrophy. Proc Natl Acad Sci 1999;96:6307–11

<https://www.pnas.org/content/96/11/6307.short>

9. Coover DD, Le TT, McAndrew PE, Strasswimmer J, Crawford TO, Mendell JR, et al. The Survival Motor Neuron Protein in Spinal Muscular Atrophy. Hum Mol Genet 1997;6:1205–14.

10. Mailman MD, Heinz JW, Papp AC, Snyder PJ, Sedra MS, Wirth B, et al. Molecular analysis of spinal muscular atrophy and modification of the phenotype by SMN2. Genet Med 2002;4:20–6. <https://www.nature.com/articles/gim20024>

11. Lefebvre S, Burlet P, Liu Q, Bertrand S, Clermont O, Munnich A, et al. Correlation between severity and SMN protein level in spinal muscular atrophy. Nature genetics. 1997;16:265–9.

<https://www.ncbi.nlm.nih.gov/pubmed/9207792>

499

500 12. The American College of Obstetricians and Gynecologists. Committee

501 Opinion No. 691. Obstetrics & Gynecology. 2017;129:e41–55.

502

503

504 13. Prior TW, Nagan N, Sugarman EA, Batish SD, Braastad C. Technical

505 standards and guidelines for spinal muscular atrophy testing. Genet Med

506 2011;13:686–94.

507

508 14. Campbell L, Potter A, Ignatius J, Dubowitz V, Davies K. Genomic Variation

509 and Gene Conversion in Spinal Muscular Atrophy: Implications for Disease

510 Process and Clinical Phenotype. The American Journal of Human Genetics

511 1997;61:40–50.

512

513 15. Luo M, Liu L, Peter I, Zhu J, Scott SA, Zhao G, et al. An Ashkenazi Jewish

514 SMN1 haplotype specific to duplication alleles improves pan-ethnic carrier

515 screening for spinal muscular atrophy. Genet Med 2013;16:149–56.

516

517 16. Abou Tayoun AN, Burchard PR, Malik I, Scherer A, Tsongalis GJ.

518 Democratizing Molecular Diagnostics for the Developing World. American Journal

519 of Clinical Pathology. 2014;141:17–24.

520 <https://academic.oup.com/ajcp/article/141/1/17/1766064>

521

17. Abou Tayoun AN. Unequal global implementation of genomic newborn screening. *Nature Reviews Genetics* 2023;24:801–2.  
<https://pubmed.ncbi.nlm.nih.gov/37723349/>
18. Sa'adah N, Harahap NIF, Nurputra DK, Rochmah MA, Morikawa S, Nishimura N, et al. A Rapid, Accurate and Simple Screening Method for Spinal Muscular Atrophy: High-Resolution Melting Analysis Using Dried Blood Spots on Filter Paper. *Clinical Laboratory* 2015;61:575–80.  
<https://pubmed.ncbi.nlm.nih.gov/26118191/>
19. 1.Li S, Han X, Xu Y, Chang C, Gao L, Li J, et al. Comprehensive analysis of spinal muscular atrophy (CASMA): SMN1 copy number, intragenic mutation and 2 + 0 carrier analysis by third-generation sequencing. *J Mol Diagnostics* 2022; 24:1009–20.
20. Chen X, Harting J, Farrow EG, Thiffault I, Kasperaviciute D, Hoischen A, et al. Comprehensive SMN1 and SMN2 profiling for spinal muscular atrophy analysis using long-read PacBio HiFi sequencing. *Am J of Hum Genetics* 2023;110:240–50.
21. Budimirovic DB, Schlageter A, Filipovic-Sadic S, Protic DD, Bram E, Mahone EM, et al. A Genotype-Phenotype Study of High-Resolution FMR1 Nucleic Acid and Protein Analyses in Fragile X Patients with Neurobehavioral Assessments. *Brain Sci* 2020;10:694.  
<https://www.mdpi.com/2076-3425/10/10/694/html>

547

548 22. Naofal ME, Ramaswamy S, Alsarhan A, Nugud A, Sarfraz F, Janbaz H, et al.

549 The genomic landscape of rare disorders in the Middle East. *Genome Med*

550 2023;15:5.

551

552 23. Milligan JN, Larson JL, Filipovic-Sadic S, Laosinchai-Wolf W, Huang Y-W, Ko

553 T-M, et al. Multisite Evaluation and Validation of a Sensitive Diagnostic and

554 Screening System for Spinal Muscular Atrophy that Reports SMN1 and SMN2

555 Copy Number, along with Disease Modifier and Gene Duplication Variants. *J Mol*

556 *Diagn* 2021;23:753–64.

557 <https://pubmed.ncbi.nlm.nih.gov/33798739/>

558

559 24. Zheng Z, Li S, Su J, Leung AW, Lam T, Luo R. Symphonizing pileup and full-

560 alignment for deep learning-based long-read variant calling. *Nat Comput Sci*

561 2022;2:797-803.

562

563 25. Vezain M, Saugier-veber P, Goina E, Touraine R, Manel V, Toutain A, et al.

564 A rare SMN2 variant in a previously unrecognized composite splicing regulatory

565 element induces exon 7 inclusion and reduces the clinical severity of spinal

566 muscular atrophy. *Human Mutation* 2010;31:E1110–25.

567

568 26. Ruhno C, McGovern VL, Avenarius MR, Snyder PJ, Prior TW, Nery FC, et al.

569 Complete sequencing of the SMN2 gene in SMA patients detects SMN gene

570 deletion junctions and variants in SMN2 that modify the SMA phenotype. *Human*



genetics 2019;138:241–56.

<https://www.ncbi.nlm.nih.gov/pmc/articles/PMC6503527/>

27. Finkel RS, Mercuri E, Darras BT, Connolly AM, Kuntz NL, Kirschner J, et al. Nusinersen versus Sham Control in Infantile-Onset Spinal Muscular Atrophy. N Engl J Med 2017;377:1723–32.

<https://www.ncbi.nlm.nih.gov/pubmed/29091570>

28. Pechmann A, Langer T, Schorling D, Stein S, Vogt S, Schara U, et al. Evaluation of Children with SMA Type 1 Under Treatment with Nusinersen within the Expanded Access Program in Germany. J Neuromuscul Dis 2018;5:135–43. <https://www.ncbi.nlm.nih.gov/pubmed/29689734>

**Table 1.** PCR/Nanopore assay performance based on concordance data using clinical samples with known SMN1/2 copy number status.

| COPY NUMBER | NUMBER OF CLINICAL BLOOD SAMPLES (BOTH DESIGNS) |
|-------------|-------------------------------------------------|
|-------------|-------------------------------------------------|

| STATE | SMN1 (N=70) | SMN2 (N = 67) |
|-------|-------------|---------------|
| 0     | 30/30       | 7/7           |
| 1     | 8/8         | 7/7           |
| 2     | 22/22       | 37/39         |
| ≥ 3   | 10/10       | 14/14         |

596

597

598

## 599 Figure Legends

600 **Figure 1.** The prototype PCR/Nanopore Assay design and workflow involves two  
601 separate PCR reactions that amplify either 2.7kb or 11.2kb amplicon products.  
602 Amplicons are barcode tagged for each sample in a second PCR reaction, then  
603 pooled by mass into a single sequencing library. The library is prepared by  
604 appending nanopore-specific adaptors and loaded into a MinION flowcell for  
605 sequencing on a Mk1B connected to a computer running MinKNOW software  
606 (Oxford Nanopore Technologies). Data are analyzed with off-the-shelf and assay-  
607 specific software.

608 **Figure 2.** Study design for assay development consisted of three phases.

609 **Figure 3.** Performance of the assay to identify copy number across cell lines or  
610 presumed normal whole blood samples within the optimization data set for SMN1  
611 (orange) or SMN2 (blue) utilizing the 2.7kb fragment or both designs where call  
612 threshold flagging would prioritize the copy number call from the 11.2kb amplicon.  
613 Genotype agreement was >97% for both SMN1 and SMN2 using both designs, and  
614 100% for the limited number of 0 and 1 copy SMN1 samples in this data set.

615 **Figure 4.** Confusion matrix comparing the expected and predicted SNVs associated  
616 with silent carrier or disease modifier risk. The algorithm accurately identified each  
617 variant type except for two. †Inspection of the underlying trace data for these two  
618 samples in the comparator assay revealed a profile consistent with false-positive  
619 calls and a defined root cause in each case. This correction would result in 100%  
620 agreement across each variant for the PCR/Nanopore assay.

621

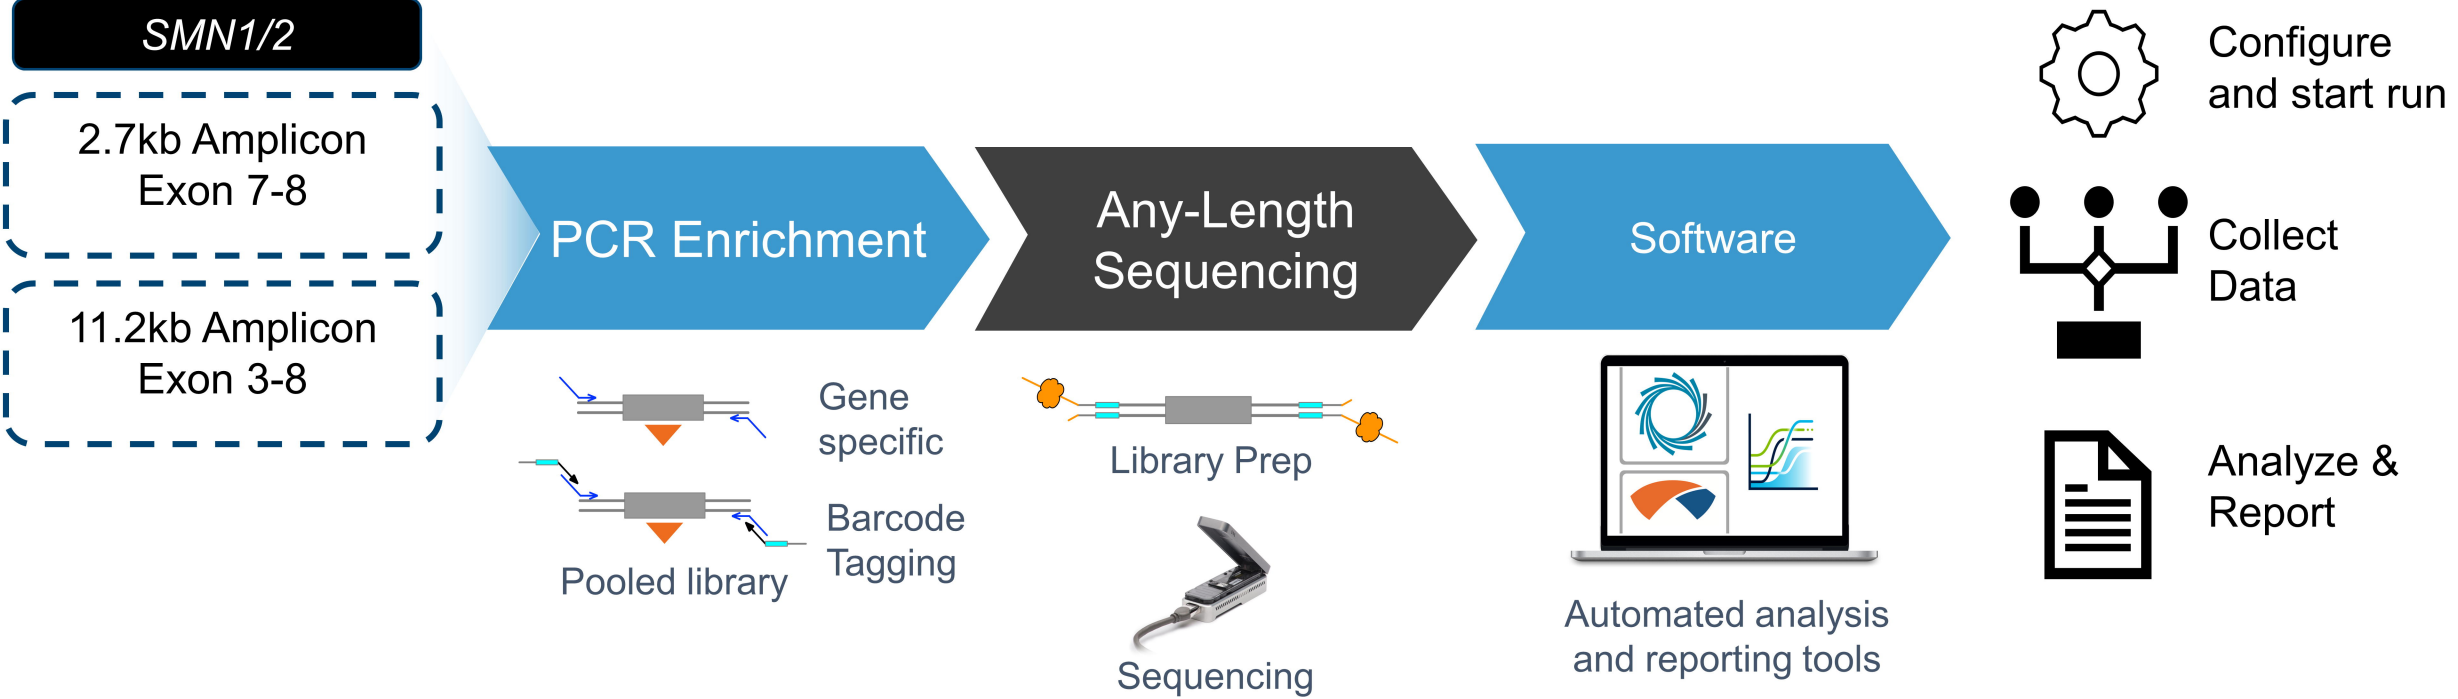

## Prototyping Phase

79 Cell Lines  
352 Whole Blood

Combine multiplex primer design, reagents, algorithms, and protocol into a proof-of-concept assay with known samples across a collection of diverse *SMN1* and *SMN2* copy number samples.

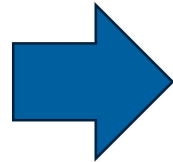

## Optimization Phase

97 Cell Lines (79 + 18 new)  
227 new Whole Blood

Optimize performance on a partially independent set of samples that exemplifies *SMN1* and *SMN2* copy numbers associated with screening and diagnostics, across operators, instruments, and input quantities.

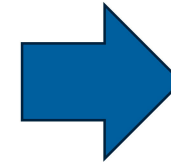

## Evaluation Phase

70 Clinical Samples

Evaluate assay performance across an independent clinical cohort of patients from 15 primarily Middle East and North Africa countries.

2.7kb design

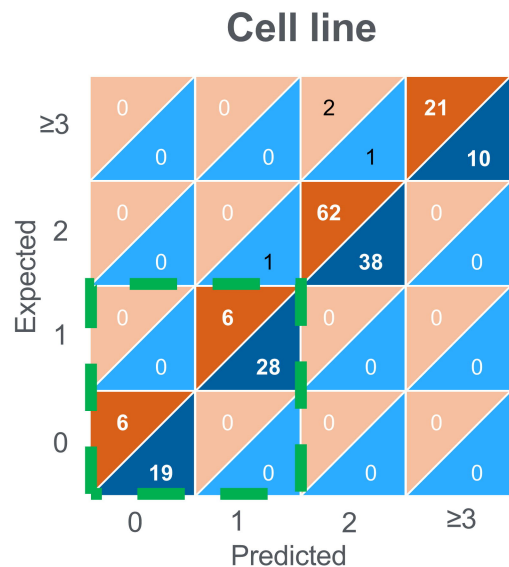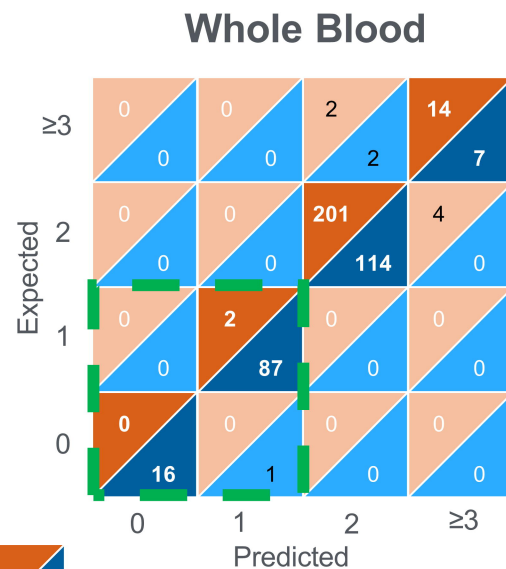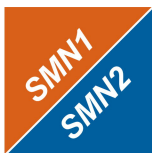

Genotype Agreement

|             | SMN1               | SMN2               | SMN1<br>0 or 1 cp |
|-------------|--------------------|--------------------|-------------------|
| Cell Line   | 95/97<br>(97.9%)   | 95/97<br>(97.9%)   | 12/12<br>(100%)   |
| Whole Blood | 218/227<br>(96.0%) | 224/227<br>(98.7%) | 2/2<br>(100%)     |

2.7kb & 11.2kb design

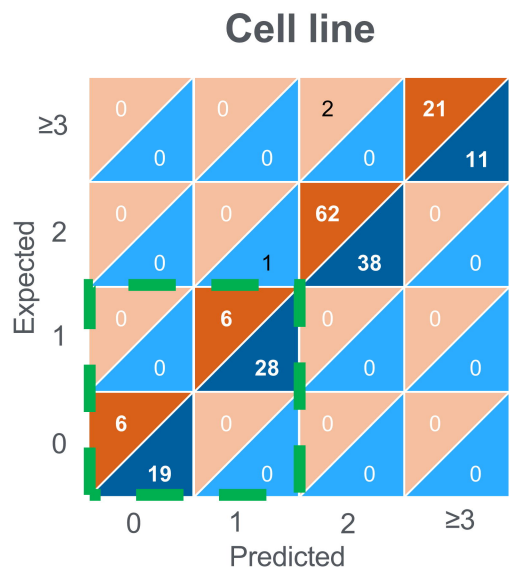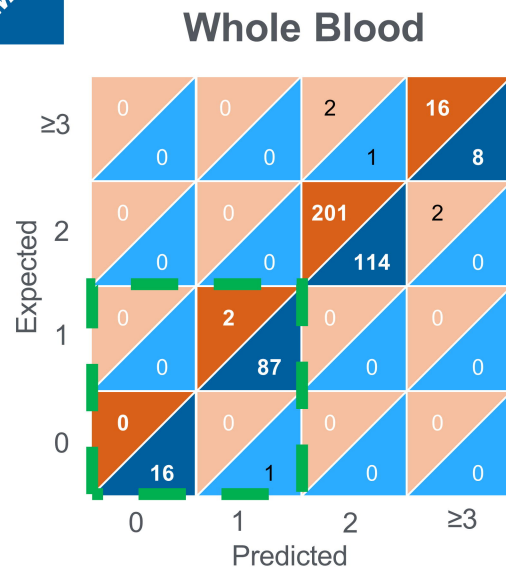

Genotype Agreement

|             | SMN1               | SMN2               | SMN1<br>0 or 1 cp |
|-------------|--------------------|--------------------|-------------------|
| Cell Line   | 95/97<br>(97.9%)   | 96/97<br>(99.0%)   | 12/12<br>(100%)   |
| Whole Blood | 221/227<br>(97.3%) | 224/227<br>(98.7%) | 2/2<br>(100%)     |

**c.\*3+80T>G**

| Expected | Predicted |          |
|----------|-----------|----------|
|          | Negative  | Positive |
| Positive | 0         | 21       |
| Negative | 303       | 0        |

**c.\*211\_212del**

| Expected | Predicted      |          |
|----------|----------------|----------|
|          | Negative       | Positive |
| Positive | 2 <sup>†</sup> | 20       |
| Negative | 302            | 0        |

**c.859G>C**

| Expected | Predicted |          |
|----------|-----------|----------|
|          | Negative  | Positive |
| Positive | 0         | 3        |
| Negative | 321       | 0        |
